# Supplementary material
Source: bioRxiv or medRxiv preprint supplement (https://www.biorxiv.org/highwire/filestream/58176/field_highwire_adjunct_files/0/098848-1.pdf)
Supplement: Supplementary file [file 098848-1.pdf]

# ER-positive breast cancer cells are poised for RET-mediated endocrine resistance

Sachi Horibata,<sup>1,2</sup> Edward J. Rice,<sup>1</sup> Hui Zheng,<sup>1</sup> Lynne J. Anguish,<sup>1</sup> Scott A. Coonrod,<sup>1,3</sup> and Charles G. Danko<sup>1,3,4</sup>

<sup>1</sup>Baker Institute for Animal Health, College of Veterinary Medicine, Cornell University, Ithaca, NY 14853, USA

<sup>2</sup>Department of Molecular Medicine, College of Veterinary Medicine, Cornell University, Ithaca, NY 14853, USA

<sup>3</sup>Department of Biomedical Sciences, College of Veterinary Medicine, Cornell University, Ithaca, NY 14853, USA

<sup>4</sup>Lead Contact

## **Address correspondence to:**

Charles G. Danko, Ph.D.  
Baker Institute for Animal Health  
Cornell University  
Hungerford Hill Rd.  
Ithaca, NY 14853  
Phone: (607) 256-5620  
E-mail: dankoc@gmail.com

Scott A. Coonrod, Ph.D.  
Baker Institute for Animal Health  
Cornell University  
Hungerford Hill Rd.  
Ithaca, NY 14853  
Phone: (607) 256-5657  
E-mail: sac269@cornell.edu

2

| Cell Clone    | Resistance | Treatment | Time | Uniquely mapped reads |
|---------------|------------|-----------|------|-----------------------|
| B7            | TamS       | None      |      | 21314970              |
| C11           | TamS       | None      |      | 20333086              |
| G11           | TamR       | None      |      | 22161480              |
| H9            | TamR       | None      |      | 23454417              |
| <b>Total:</b> |            |           |      | <b>87,263,953</b>     |

**Supplementary Table 1. PRO-seq data collection and sequencing depth.** PRO-seq was conducted in the indicated cell clone and biological condition. Raw PRO-seq data were sequenced to a read depth >20 million uniquely mapped reads and aligned using established pipelines.

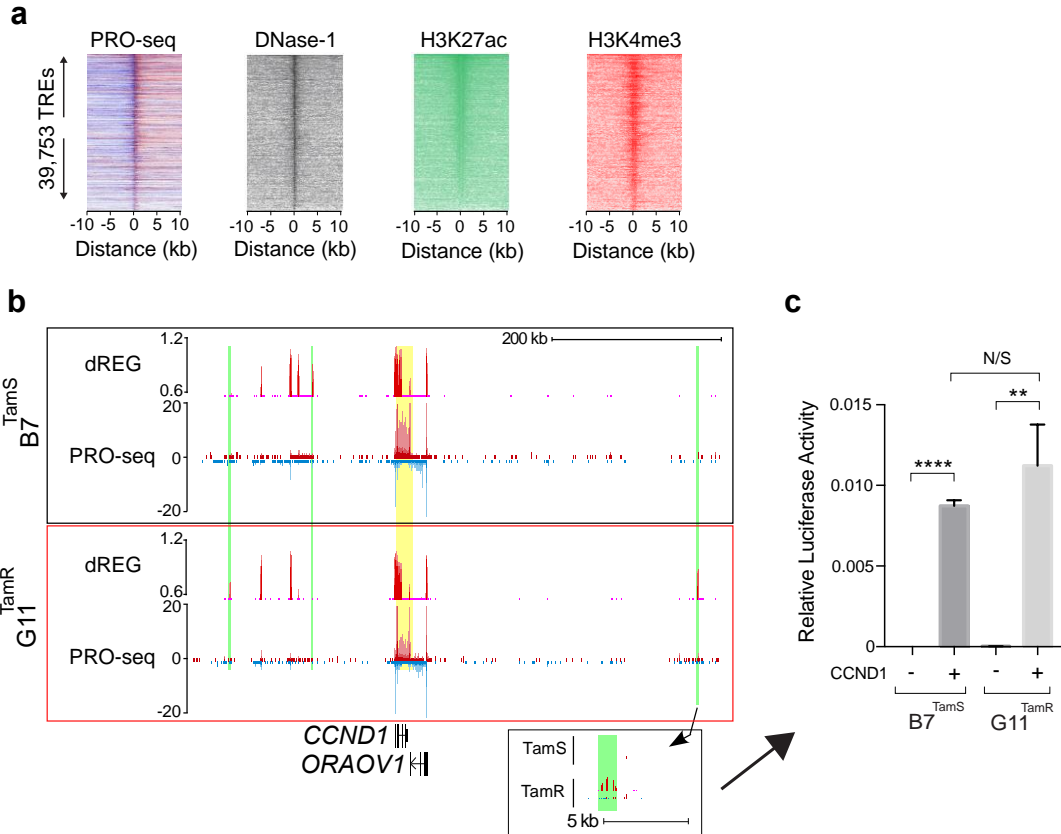

**Supplementary Figure 1. dREG identifies highly enriched active enhancers and promoter makers in MCF-7 cells.** (a) Heatmap depicting PRO-seq, DNase-1-seq, H3K27ac, and H3K4me3 near 39,753 transcriptional regulatory elements (TREs) identified using dREG-HD from PRO-seq data (left) in TamS and TamR MCF-7 cells. (b) Transcription and dREG scores in the locus near the *CCND1* gene in B7<sup>TamS</sup> and G11<sup>TamR</sup> MCF-7 cells. (c) Luciferase activity in B7<sup>TamS</sup> and G11<sup>TamR</sup> MCF-7 cells in the presence of an enhancer located approximately 300kb downstream of *CCND1*. All data normalized to renilla control. Data are represented as mean  $\pm$  SEM (n=3). \*\* p < 0.01, \*\*\*\* p < 0.0001.

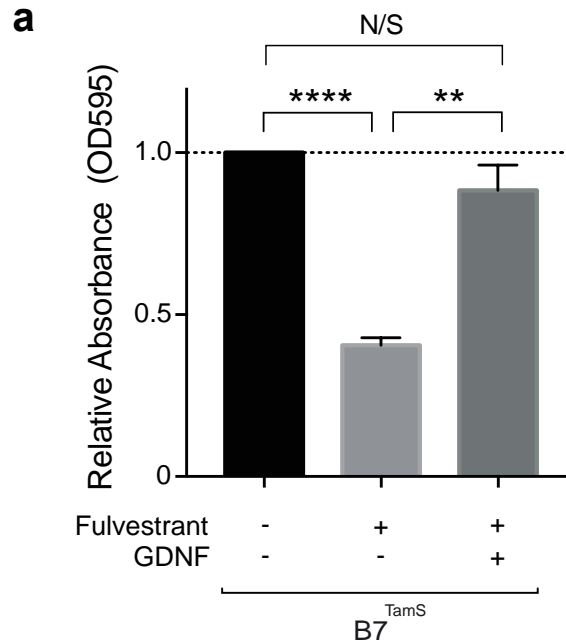

**Supplementary Figure 2. GDNF induces fulvestrant resistance in TamS cells. (a)** Cell viability of B7<sup>TamS</sup> cells in the presence or absence of 10 ng/ml GDNF and/or 100 mM fulvestrant for 4 days. Data are represented as mean  $\pm$  SEM (n=3). \*\*  $p < 0.005$ , \*\*\*\*  $p < 0.0001$ .

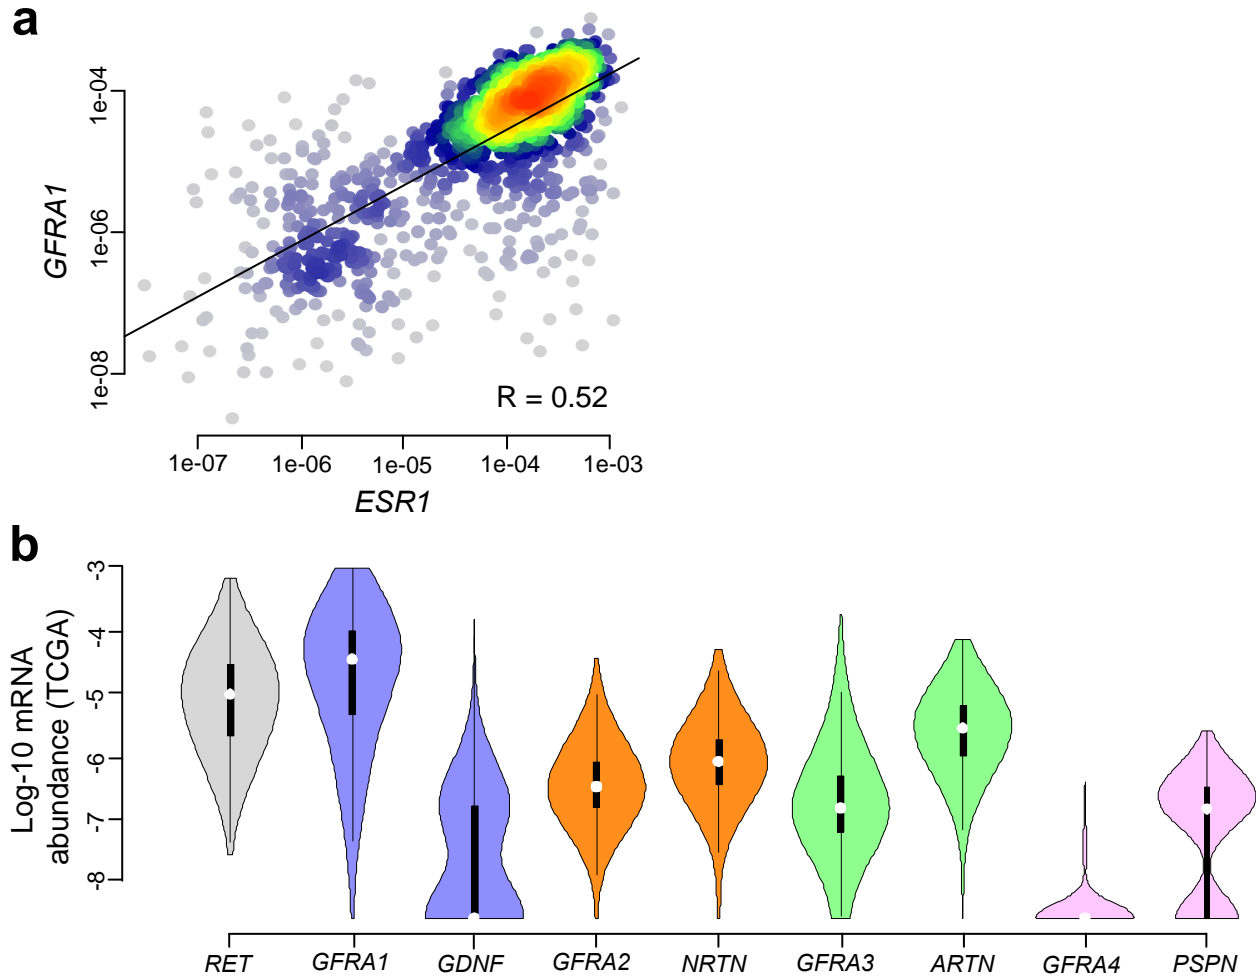

**Supplementary Figure 3. RET ligand expression is low compared to RET and GFR $\alpha$ 1 receptors.** (a) Density scatterplot showing the relationship between *GFRA1* and *ESR1* expression levels in 1,177 primary breast cancer samples in the cancer genome atlas (TCGA). Pearson's  $R = 0.52$ ;  $p < 2.2e-16$ . (b) Violin plots depicting the absolute normalized expression level of receptor-tyrosine kinase receptors and ligands in 1,177 primary breast cancer samples (TCGA). For each color, the pair of genes represents receptor (left) and ligand (right). Gray represents the *RET* gene which encodes the RET tyrosine kinase receptor required for signal transduction of all four RET ligands.
